# Supplementary material
Source: PubMed Central journal article supplement (PMC2918402)
Supplement: NIHMS220570-supplement-Supplemental_Fig_2.pdf [file NIHMS220570-supplement-Supplemental_Fig_2.pdf]

## Supplementary Figure 2

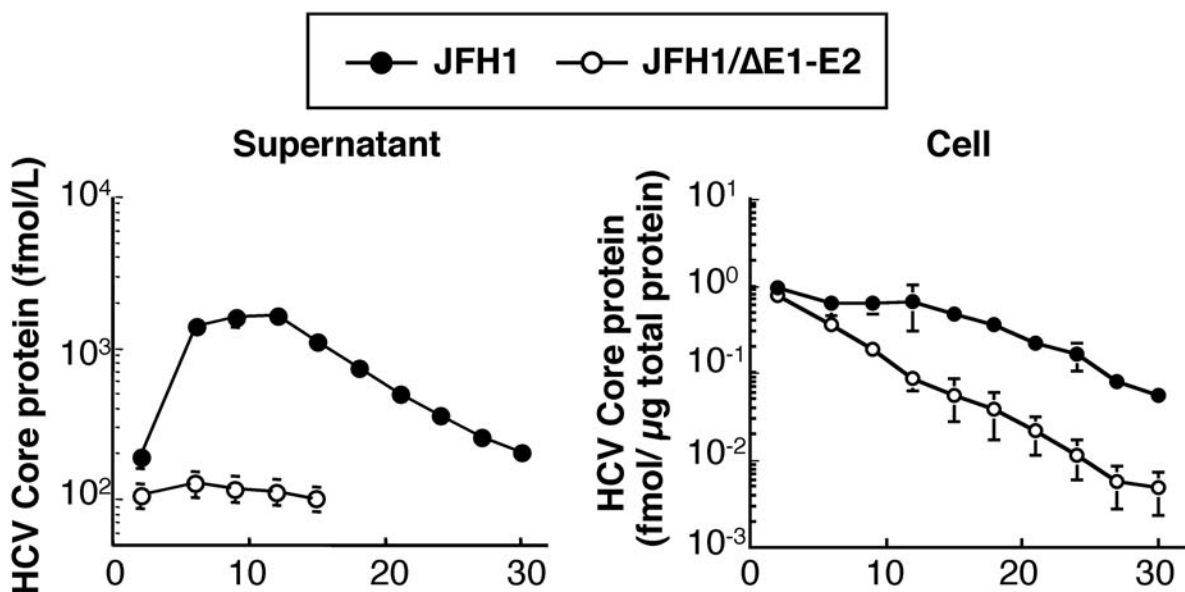

**Supplementary Fig. 2:** HCV core protein secreted from passaged transfected cells. Huh7 cells transfected with JFH1 or JFH1/ΔE1-E2 were passaged at 2, 5, 8, 12, 15, 18, 21, 24, 27 and 30 days after transfection. Cells were seeded at  $1 \times 10^6$  cells/10-cm dish at each passage and continuously cultured. Levels of HCV Core protein were determined in culture supernatant (left panel) and in cell lysate (right panel). Data represent mean with SD of 3 independent dishes. More sustained HCV core protein levels were observed with JFH1 as compared to JFH1/ΔE1-E2.
