# Supplementary material
Source: PubMed Central journal article supplement (PMC2918402)
Supplement: NIHMS220570-supplement-Supplemental_Fig_5.pdf [file NIHMS220570-supplement-Supplemental_Fig_5.pdf]

## Supplementary Figure 5

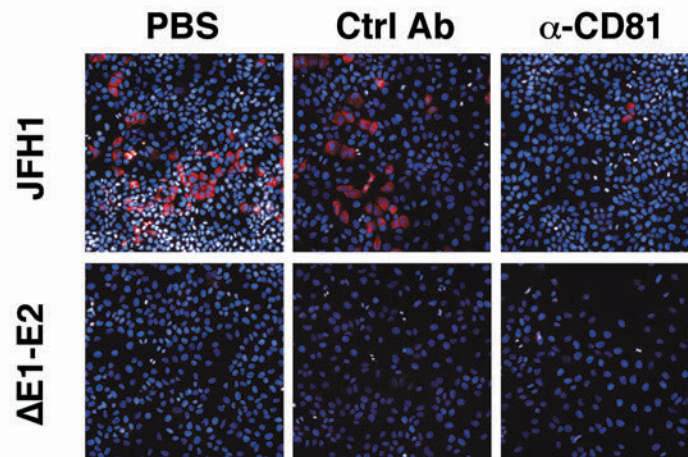

**Supplementary Fig.5:** CD81-dependent infection of Huh7 cells with cell culture-derived HCV. Twenty-fold concentrated supernatants from cells transfected with given genomes were used for infection of Huh7 cells in the presence of a CD-81 specific ( $\alpha$ -CD81; JS-81, 10 $\mu$ g/ml, right panels) or a non-relevant monoclonal antibody (Ctrl Ab; 10 $\mu$ g/ml, middle panels) or in the absence of antibodies (PBS, left panels). NS3 was detected in infected cells by indirect immunofluorescence after 48 h (red staining). DNA was counter-stained with Dapi (blue).
