# Supplementary material
Source: PubMed Central journal article supplement (PMC2918402)
Supplement: NIHMS220570-supplement-Supplemental_Fig_6.pdf [file NIHMS220570-supplement-Supplemental_Fig_6.pdf]

## Supplementary Figure 6

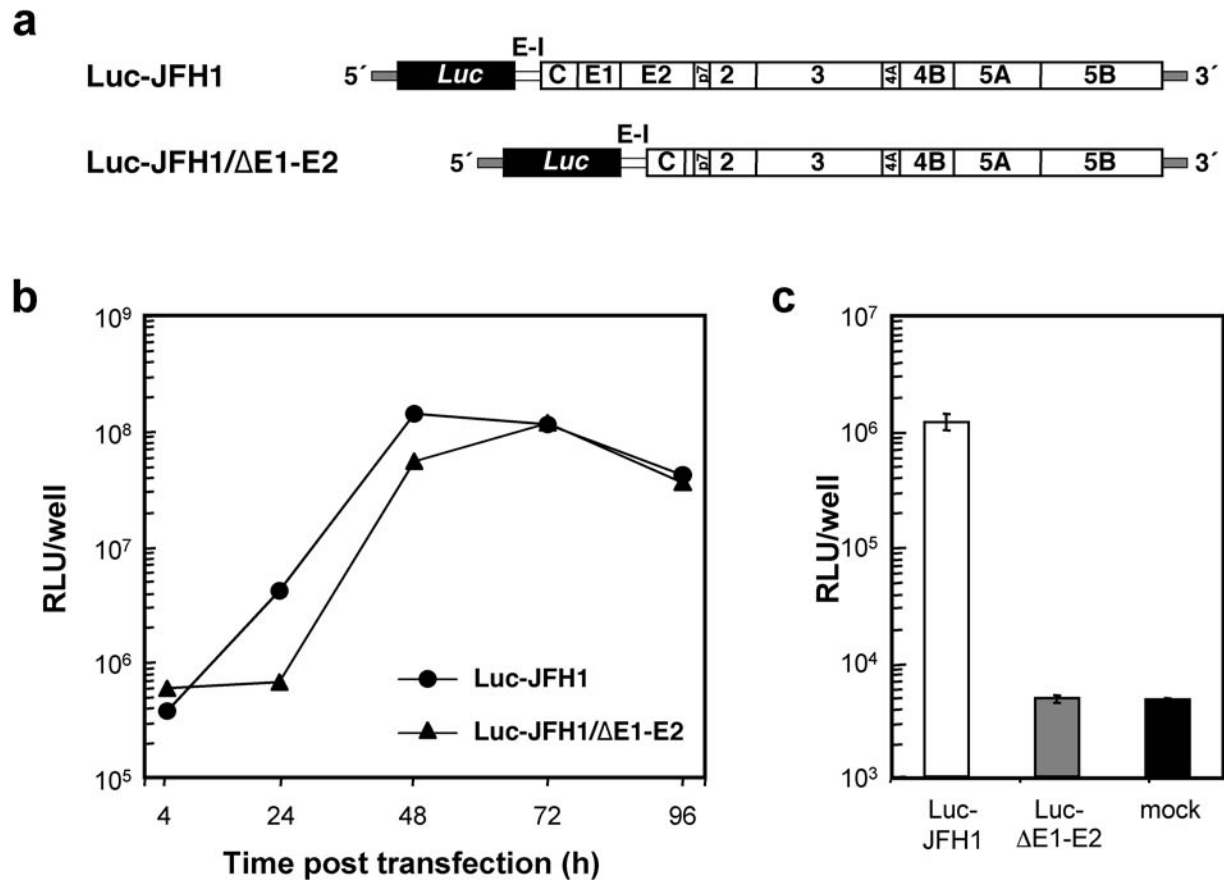

**Supplementary Fig.6:** (a) Schematic representation of bicistronic Luc-JFH1 and Luc-JFH1/ΔE1-E2 constructs with luciferase reporter gene. The luciferase gene (black) is fused in frame to the 16 N-terminal residues of HCV core and expressed via the HCV IRES whereas HCV proteins are expressed via the EMCV-IRES (E-I; white bar). Expression level of luciferase correlates with RNA replication and can be used to quantify transfection and infection efficiency. (b) Luciferase activity in transiently transfected cells. In vitro transcribed RNAs of given constructs were transfected into Huh7 cells that were harvested at the indicated time points. Both constructs replicate efficiently in transfected cells. (c) Productive infection of Huh7 target cells with luciferase reporter viruses. Huh7 cells were inoculated with cell free supernatants derived from cells transfected with the indicated genomes. Seventy two hours later, the amount of luciferase activity per inoculated well was determined. As a reference background activity determined in mock infected cells is shown (black bar). Mean values of duplicates and the error range are given.
